# Supplementary material for: The Golgi-associated retrograde protein (GARP) complex plays an essential role in the maintenance of the Golgi glycosylation machinery
Source: PubMed Central journal article supplement — Mol Biol Cell. 2021 Aug 15;32(17):1594–610. doi: 10.1091/mbc.E21-04-0169 (PMC8351751; doi:10.1091/mbc.e21-04-0169), 2021-08-15

# Supplemental Materials

*Molecular Biology of the Cell*

Khakurel *et al.*

**Supplementary Fig. S1. GARP-KO alters glycosylation in secreted glycoproteins and total lysates.** **A**, WB of cathepsin D secreted from WT, GARP-KO and rescued RPE1 cells. Representative images from three independent experiments are shown. **B**, GNL-647 staining of secretory proteins from WT, GARP-KO and rescued RPE1 cells. **C**, HPA-647 staining of secretory proteins from WT, GARP-KOs and rescued RPE1 cells. **D, E**, GNL-647 (**D**) and HPA-647 (**E**) staining of whole-cell lysates from WT, GARP-KO HEK293T cells (left) and quantification of staining relative to WT HEK293T cells (right). Bars represent the mean  $\pm$  SD of values from three independent experiments. Statistical significance was calculated using one-way ANOVA. \*\*  $P \leq 0.01$ , \*\*\*  $P \leq 0.001$ .

**Supplementary Fig. S2. GARP KO alters the glycosylation of Golgi and lysosomal glycoproteins in HEK293T cells.** **A-D**, WB of endogenous GPP130 (**A**), TMEM165 (**B**), TGN46 (**C**) and LAMP2 (**D**) from cell lysates of WT, VPS53-KO and VPS54-KO cells. The same blot was used for incubation with rabbit anti-GPP130 and mouse anti-LAMP2 antibody; therefore, the same actin control was used.

**Supplementary Fig. S3. GARP-KO alters the stability of N- and O-Golgi glycosylation enzymes in HEK293T cells.** **A-C**, WB (top) and quantification (bottom) of MGAT1 (**A**), B4GalT1 (**B**) and ST6Gal1 (**C**). Bars represent the mean  $\pm$  SD of values from three independent experiments. Statistical significance was calculated using one-way ANOVA. \*\*\*\*  $P \leq 0.0001$ , \*\*  $P \leq 0.01$ . (**D,E**) WB analysis of GalNacT2 (**D**) and ST6Gal1 (**E**) in GARP-KO HeLa cells (top) and quantification (bottom).

**Supplementary Fig. S4. Localization of COG3 and COG8 is not altered in GARP-KO cells.** (**A**) RPE1 cells were stained for COG3 (top row) or COG8 (bottom row) together with GM130, and images were taken by Airyscan microscopy. (**B**) WB of COG3 and COG8 in GARP-KO and rescued cells.

**Supplementary Fig. S5. (A) RUSH assay reveals mislocalization of B4GalT1 in GARP-KO RPE1 and HeLa cells.** RPE1 WT and VPS54-KO cells were transfected with plasmids encoding a B4GalT1 RUSH construct and chased with biotin/cycloheximide mix for 6 h. Cells were then stained for the Golgi marker GM130. Differences in co-localization of B4GalT1 with GM130 in cells with high B4GalT1-mCh expression or low B4GalT1-mCh expression was measured in approximately 30 cells using Pearson's correlation coefficient. Statistical significance was calculated using two-way ANOVA. \*\*\*  $P \leq 0.001$ . No significant difference was observed between high B4GalT1-mCh expressed RPE1 cells and low B4GalT1-mCh expressed cells. (**B,C**) WT and VPS54-KO HeLa cells were co-transfected with plasmids encoding a B4GalT1-mCherry and MAN2A-GFP RUSH constructs and chased with biotin/cycloheximide mix

for 1 h (**B**) and 6 h(**C**), followed by staining for giantin. The arrows on **C** indicate the co-localization of B4GalT1 and MAN2A in putative endolysosomal puncta.

**Supplementary Fig. S6. B4GalT1 localization is altered after 90 min exposure to chloroquine in HeLa and RPE1 cells.** HeLa cells expressing endogenously tagged B4GalT1-GFP were treated or not treated with 0.1 mM chloroquine (CQ) for 90 min. Cells were stained for giantin and GPP130. **B**, RPE1 cells treated for 90 min with 0.1 mM chloroquine (CQ). Cells were stained for giantin, GPP130 and B4GalT1. **C**, Quantification of co-localization of B4GalT1-GFP with giantin (left panel) and giantin with GPP130 (right panel) in 40 HeLa cells using Pearson's correlation coefficient. Statistical analysis was done using paired t test in GraphPrism 8, \*\*\*\*  $P \leq 0.0001$ , ns, not significant. **D**, Quantification of co-localization of B4GalT1 with giantin in 40 RPE1 cells using Pearson's correlation coefficient. Statistical analysis was done using paired t test in GraphPrism 8, \*  $P \leq 0.05$ . ns, not significant.

**Supplementary Fig. S7. B4GalT1 recycles back to the Golgi upon chloroquine wash-out.** **A**, HeLa cells expressing endogenously tagged B4GalT1-GFP were treated for 3 h with 0.1 mM chloroquine (CQ) (top panel) and washed for 3 h in normal culture medium (bottom panel). Cells were stained for giantin and GPP130. **B**, RPE1 cells treated for 3 h with 0.1 mM chloroquine (CQ) (top panel) or washed for 3 h in normal culture medium (bottom panel). Cells were stained for giantin, GPP130 and B4GalT1. **C**, Quantification of co-localization of B4GalT1-GFP with giantin in 40 HeLa cells using Pearson's correlation coefficient. Each dot on the bar graph indicates the co-localization in cells per field. \*\*\*  $P \leq 0.001$ . **D**, Quantification of co-localization of B4GalT1 with giantin in 40 RPE1 cells using Pearson's correlation coefficient. Each dot on the bar graph indicates the co-localization in cells per field. Statistical analysis was done using GraphPad Prism (paired t test). \*\*  $P \leq 0.01$ .

# Supplementary 1

## S1A

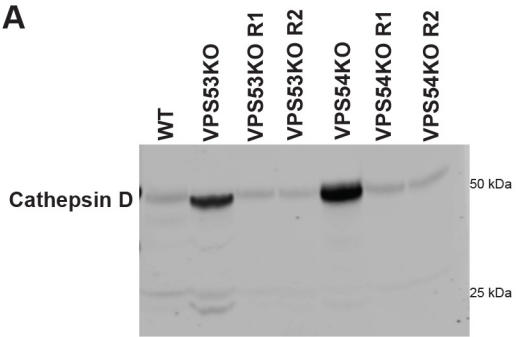

## S1B

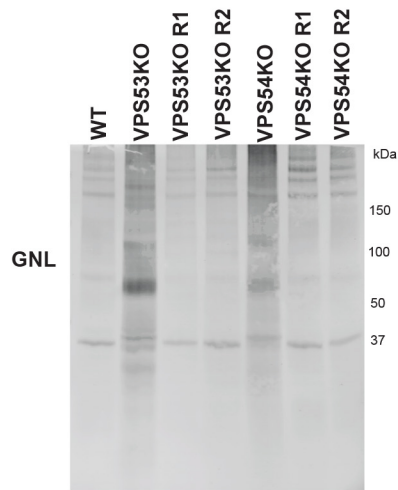

## S1C

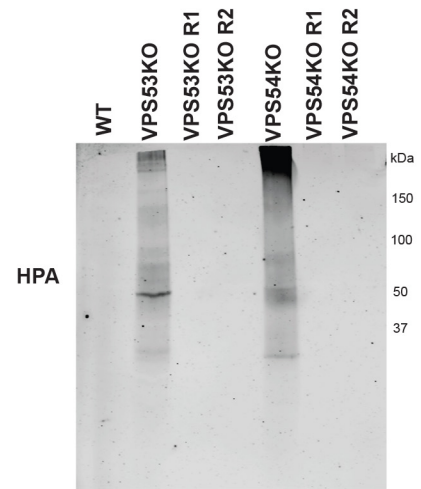

## S1D

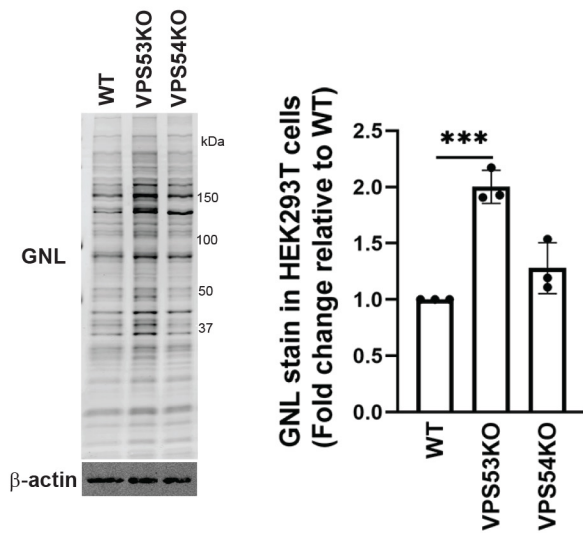

## S1E

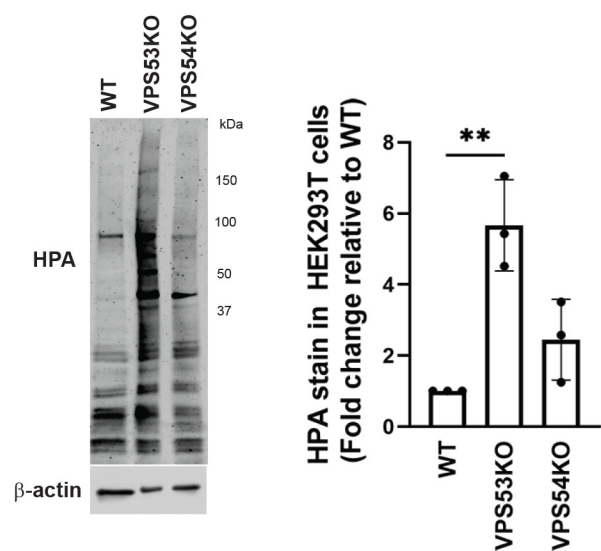

# Supplementary 2

## S2A

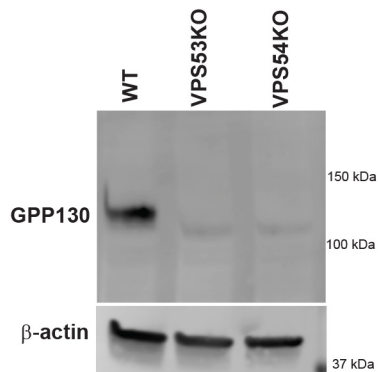

## S2B

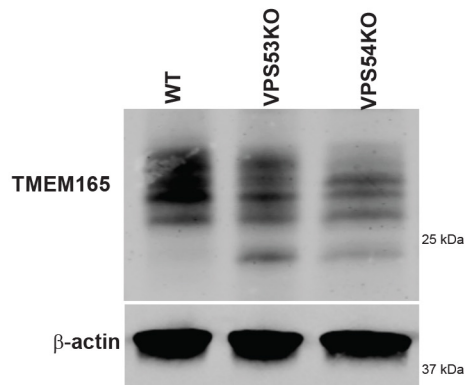

## S2C

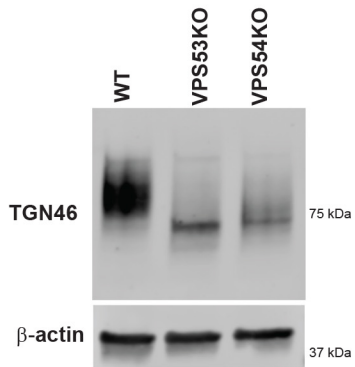

## S2D

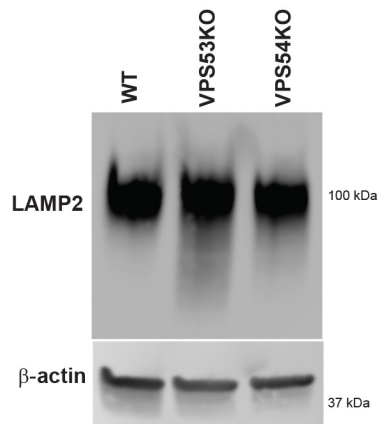

S3A

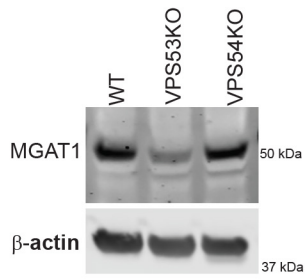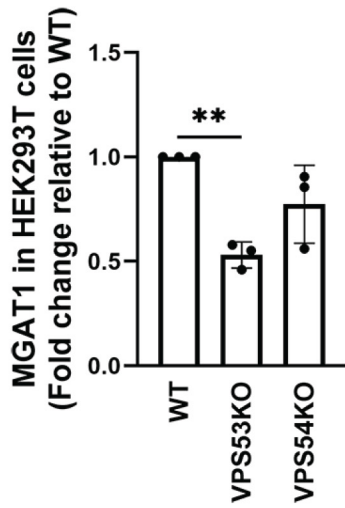

S3B

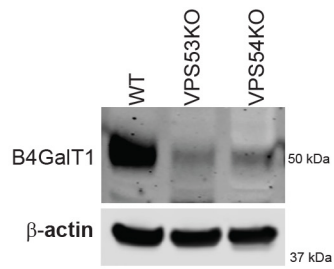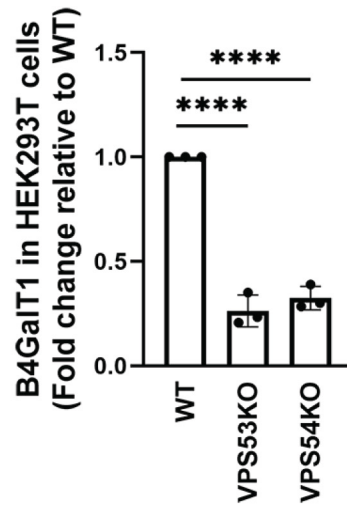

S3C

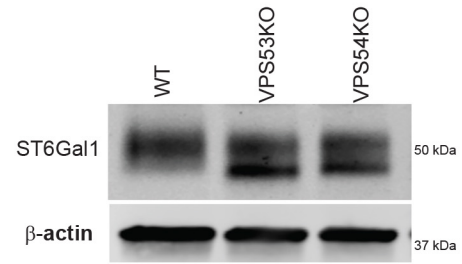

S3D

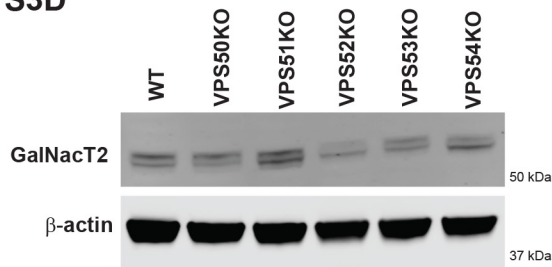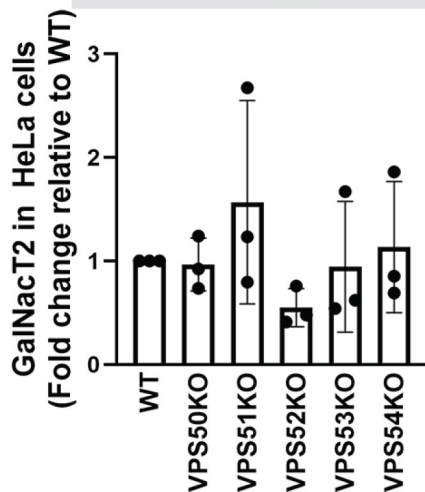

S3E

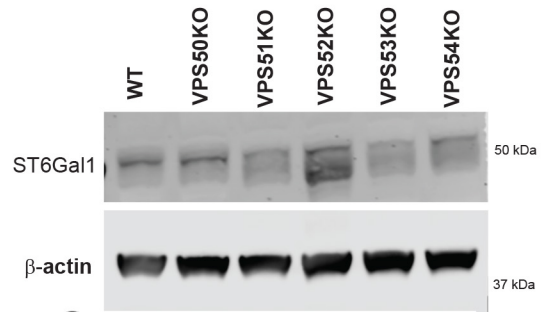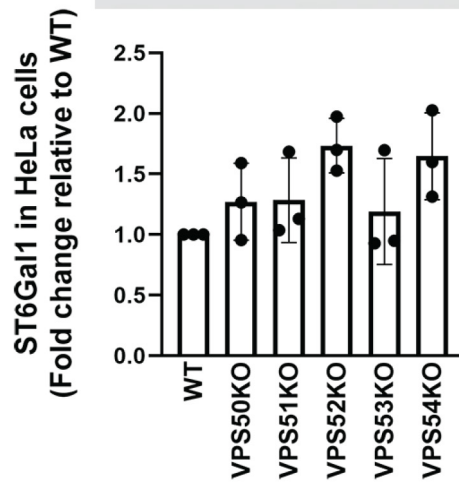



S5A

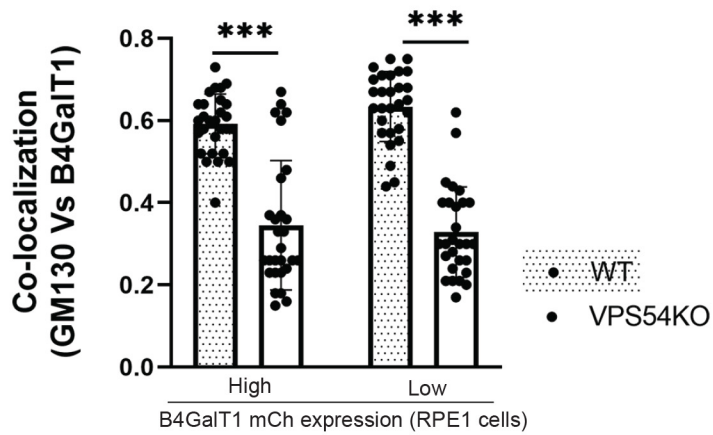

S5B

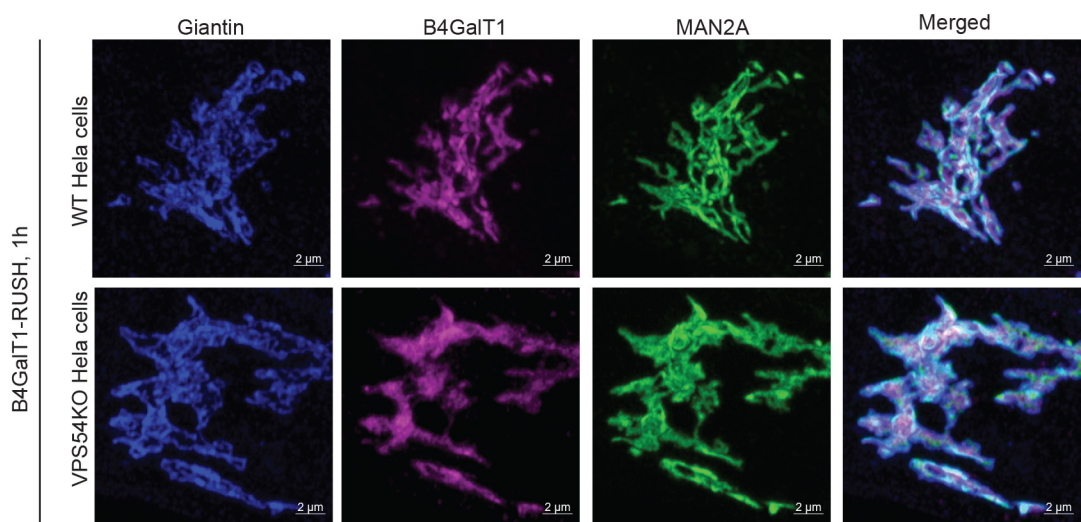

S5C

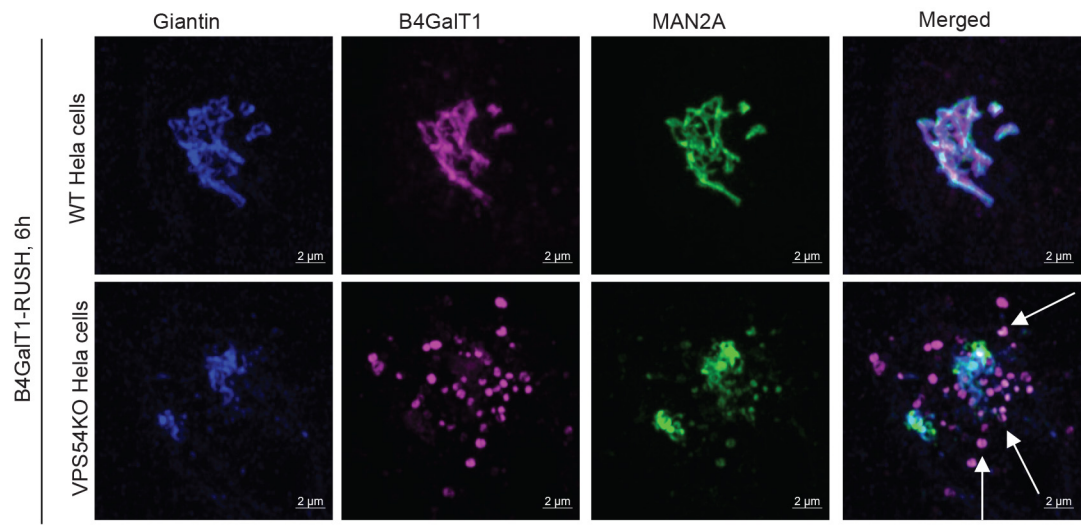



# Supplementary 6

## S6A HeLa B4GalT1-GFP expressing cells

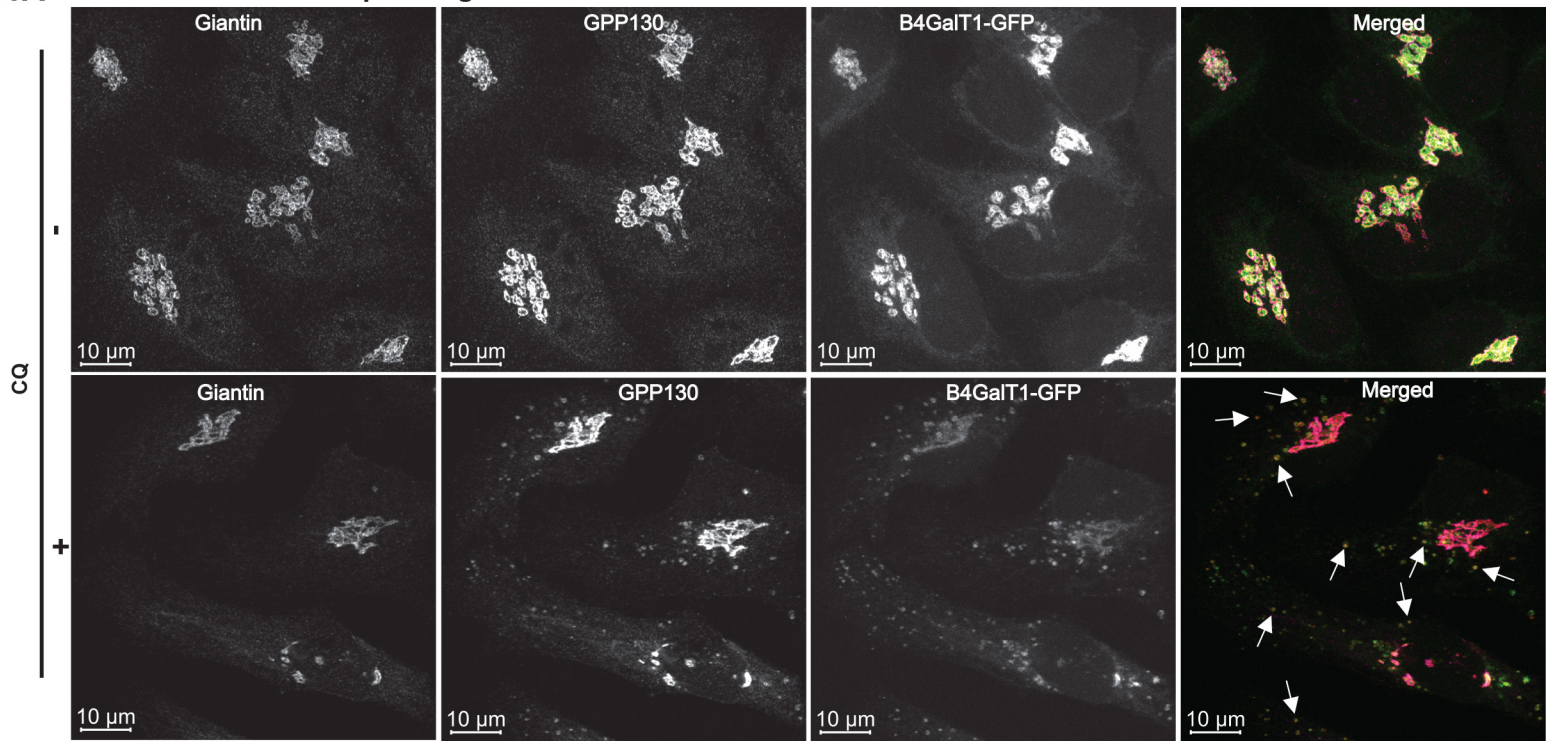

## S6B RPE1 WT cells

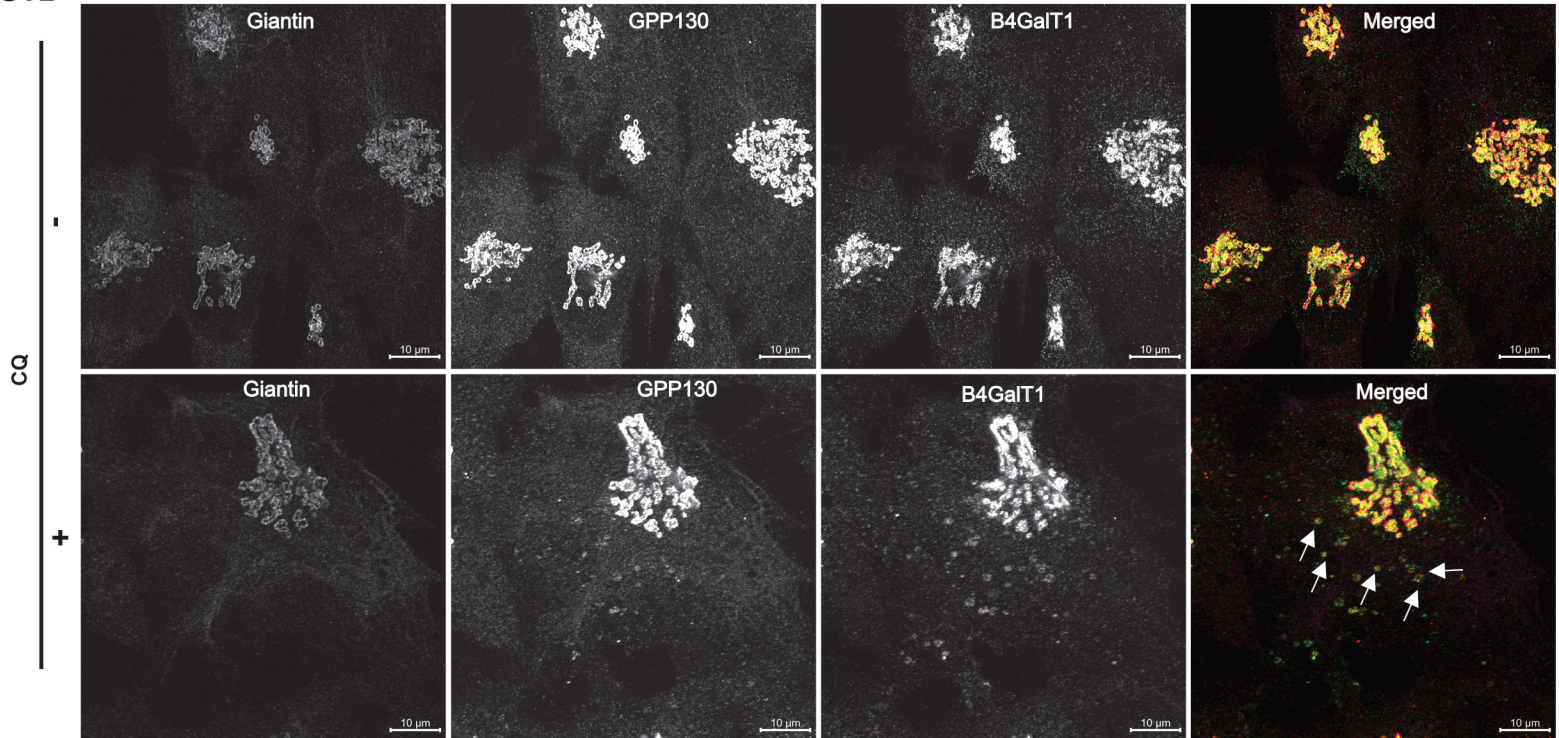

## S6C

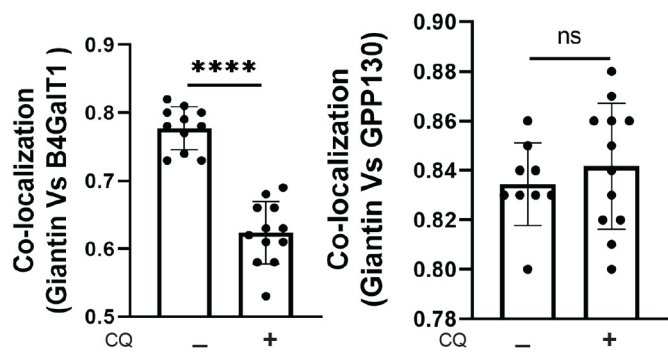

## S6D

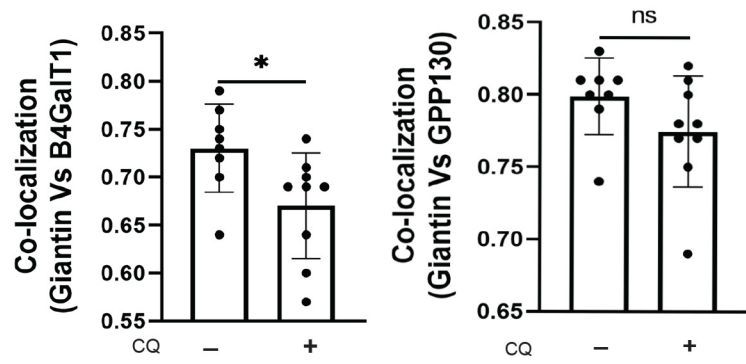

# Supplementary figure 7

## A HeLa B4GalT1-GFP expressing cells

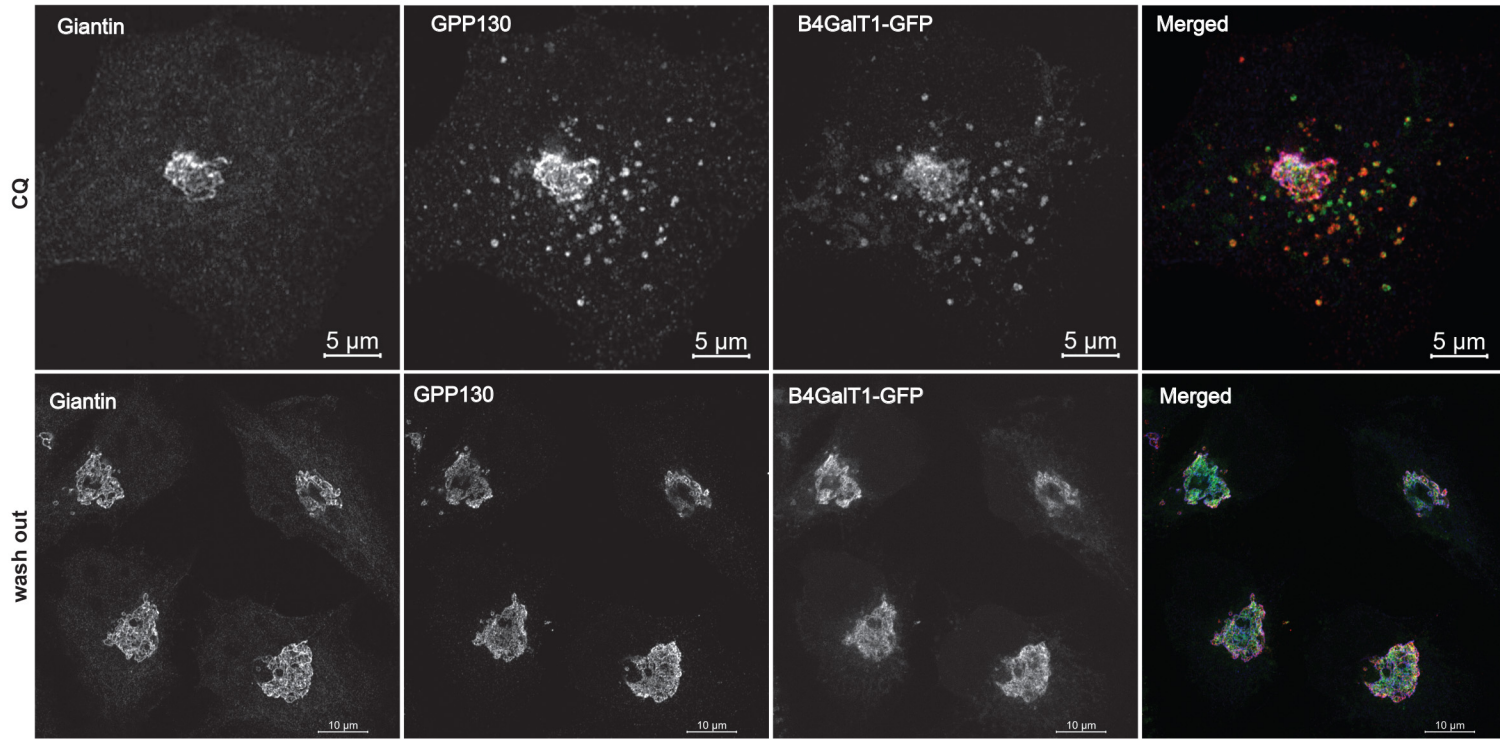

## B RPE1 WT cells

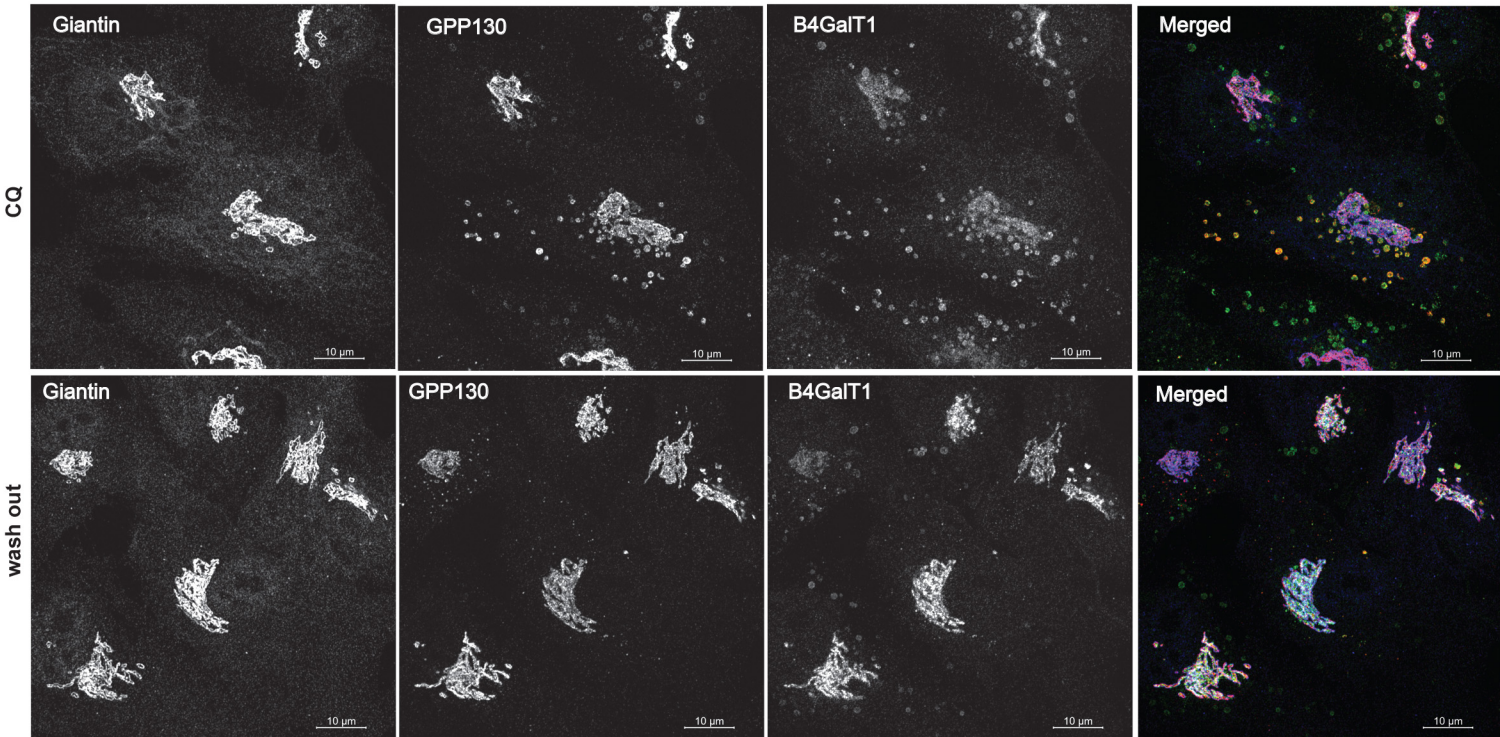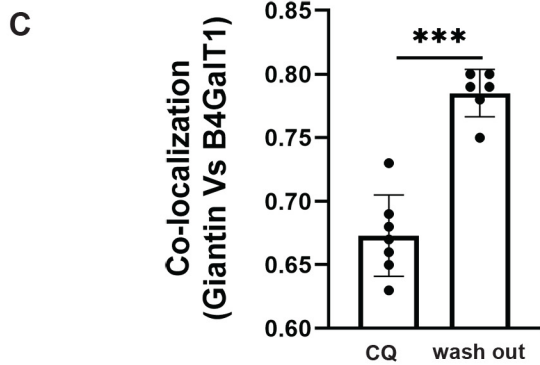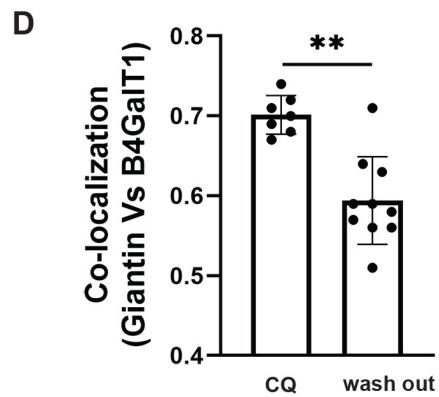

Supplement: mbc-32-1594-s001.pdf [file mbc-32-1594-s001.pdf]
